# Supplementary material for: Polymer encapsulated clinical ICG nanoparticles for enhanced photothermal therapy and NIR fluorescence imaging in cervical cancer
Source: PubMed Central journal article supplement — RSC Adv. 2021 Jun 11;11(34):20850–8. doi: 10.1039/d1ra02875h (PMC9034030; doi:10.1039/d1ra02875h), 2021-06-11
Supplement: RA-011-D1RA02875H-s001.pdf [file RA-011-D1RA02875H-s001.pdf]

## Polymer encapsulated clinical ICG nanoparticles for enhanced photothermal therapy and NIR fluorescence imaging in cervical cancer

Shuang Chen,<sup>a</sup> Lijun Zhu,<sup>b</sup> Zhong Du,<sup>a</sup> Rong Ma,<sup>a</sup> Ting Yan,<sup>b</sup> Gulnigaer Alimu,<sup>b</sup> Xueliang Zhang,<sup>b</sup> Nuernisha Alifu\*,<sup>b</sup> and Cailing Ma\*,<sup>a</sup>

<sup>a</sup>State Key Laboratory of Pathogenesis, Prevention, and Treatment of High Incidence Diseases in Central Asia/Department of Gynecology, The First Affiliated Hospital of Xinjiang Medical University. Urumqi 830054, China. E-mail: hymcl@sina.com

<sup>b</sup>State Key Laboratory of Pathogenesis, Prevention and Treatment of High Incidence Diseases in Central Asia/School of Medical Engineering and Technology, Xinjiang Medical University, Urumqi 830054, China. E-mail: nens\_xjmu@126.com

### Supplementary information

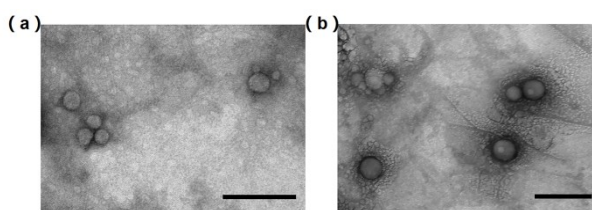

**Fig. S1** (a) Transmission electron microscope (TEM) images of clinical ICG nanoparticles (Scale bar: 200nm) and (b) ICG@PSMA nanoparticles (Scale bar: 500nm).

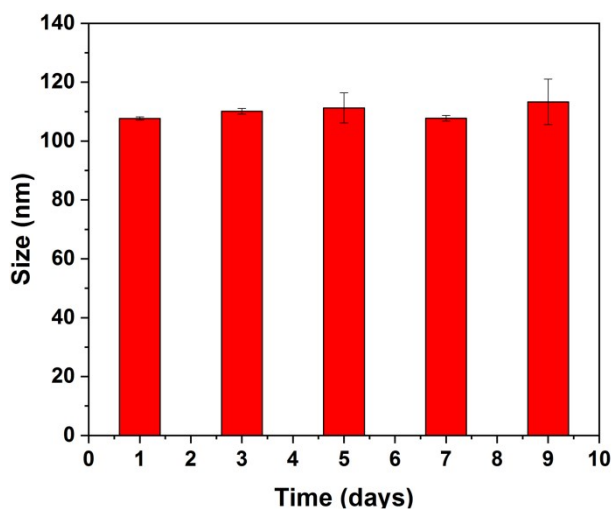

**Fig. S2** DLS size of ICG@PSMA NPs for 9 consecutive days.

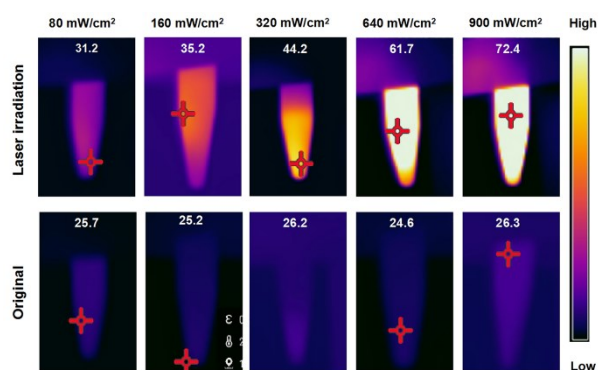

**Fig. S3** Thermal images of ICG@PSMA nanoparticles in aqueous dispersion ( $200 \mu\text{g mL}^{-1}$ ) under different power densities of 808 nm excitation.

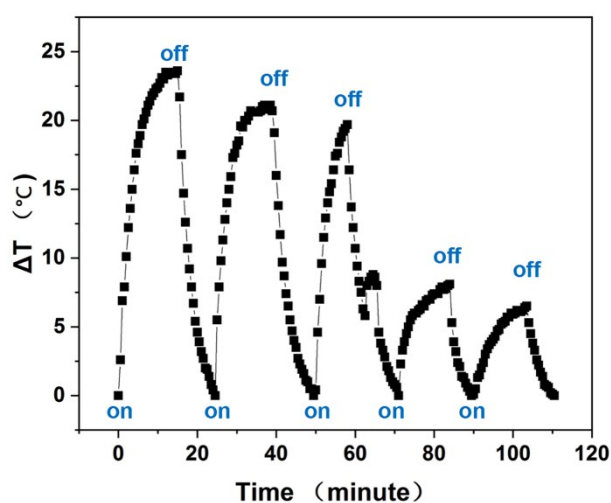

**Fig. S4** Heating/cooling curves of free ICG in aqueous dispersion ( $200 \mu\text{g mL}^{-1}$ , 808 nm excitation,  $640 \text{ mW cm}^{-2}$ ) for 5 repeated irradiation cycles.

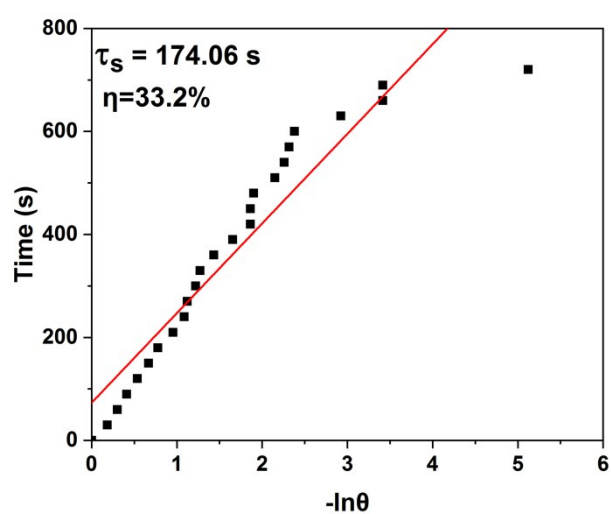

**Fig. S5** Linear time data versus  $-\ln\theta$  obtained from the cooling period of ICG@PSMA NPs in aqueous dispersion.

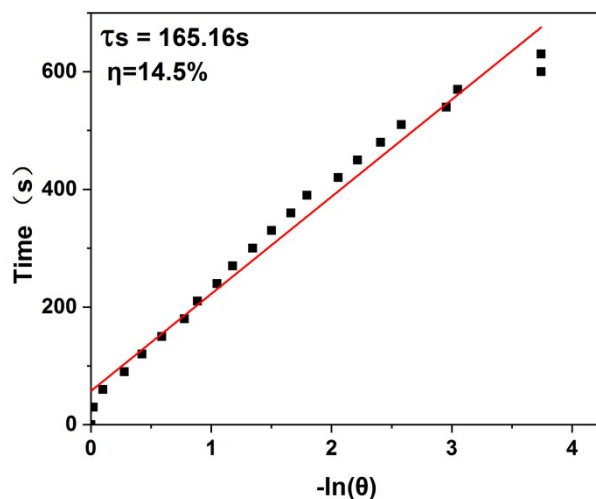

**Fig. S6** Linear time data versus  $-\ln\theta$  obtained from the cooling period of free ICG in aqueous dispersion.

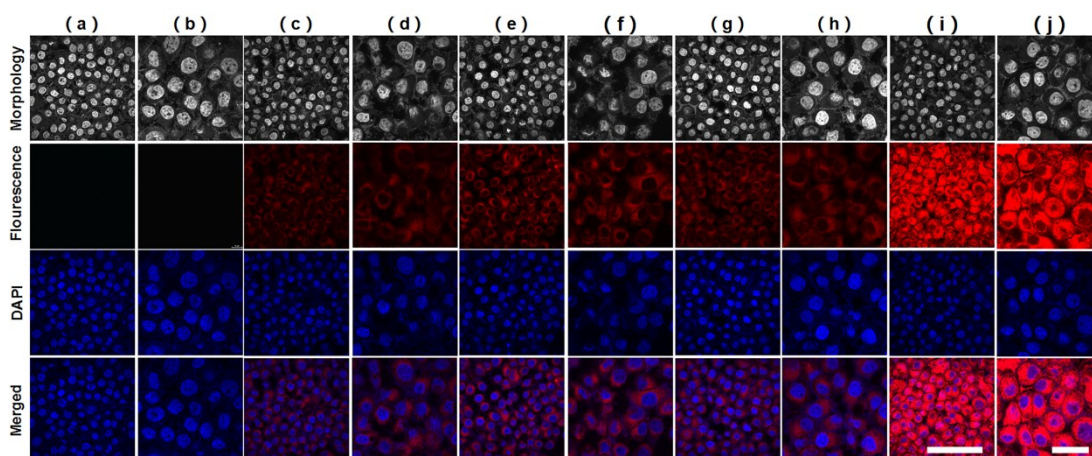

**Fig. S7** NIR fluorescence microscopic images of HeLa cells incubated with PBS, free ICG, and ICG@PSMA nanoparticles under CLSM. Images were obtained via 10 × objective (Scale bar: 100  $\mu\text{m}$ ), 20 × objective (Scale bar: 30  $\mu\text{m}$ ).  $\lambda_{\text{em}}$  = 800-1000 nm,  $\lambda_{\text{ex}}$  = 480 nm (DAPI);  $\lambda_{\text{ex}}$  = 640 nm (ICG and ICG@PSMA nanoparticles). (a) and (b) HeLa cells treated with DMEM, (c) and (d) HeLa cells incubated with ICG (50  $\mu\text{g mL}^{-1}$ ), (e) and (f) ICG@PSMA nanoparticles (50  $\mu\text{g mL}^{-1}$ ), (g) and (h) ICG (100  $\mu\text{g mL}^{-1}$ ), (i) and (j) ICG@PSMA nanoparticles (100  $\mu\text{g mL}^{-1}$ ).

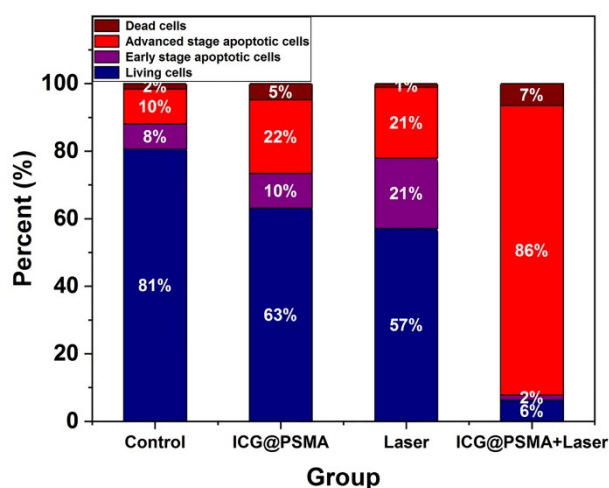

**Fig. S8** Live/dead ratios of HeLa cells with different treatments: (1) control, (2) ICG@PSMA nanoparticles ( $50 \mu\text{g mL}^{-1}$ ), (3) Laser only, (4) ICG@PSMA nanoparticles ( $50 \mu\text{g mL}^{-1}$ ) and laser (808 nm laser irradiation at a power density of  $900 \text{ mW cm}^{-2}$  for 10 minutes).

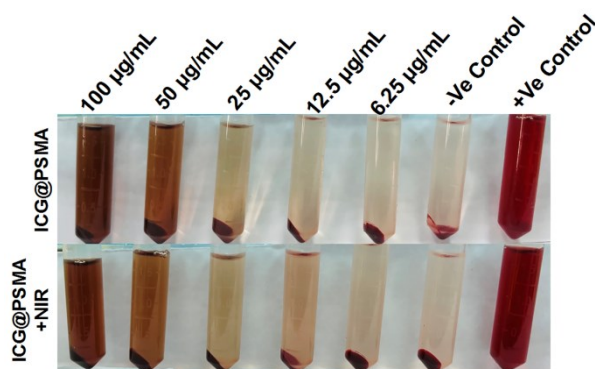

**Fig. S9** The hemolytic effect of ICG@PSMA NPs in all formulations at different concentrations (6.25, 12.5, 25, 50, and  $100 \mu\text{g/mL}$ )

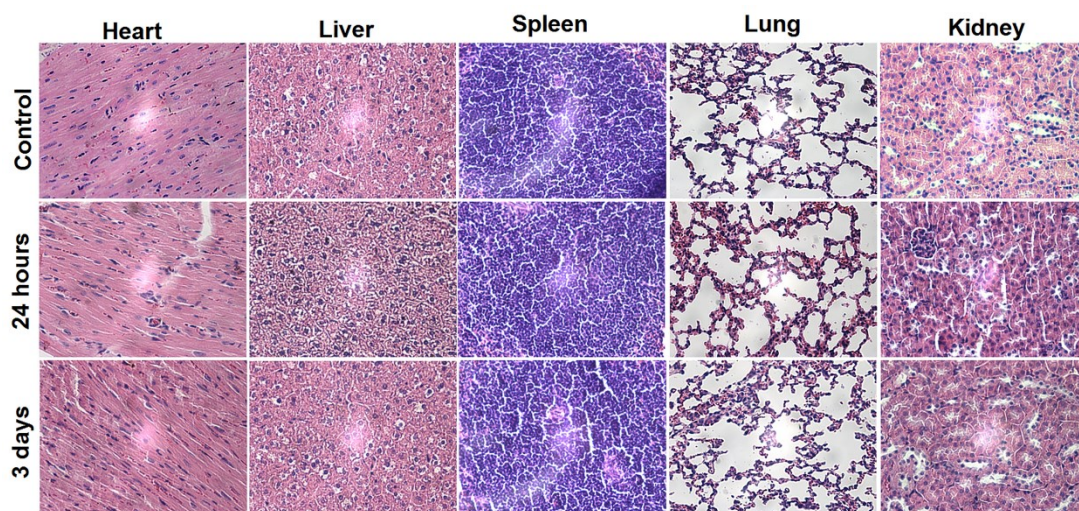

**Fig. S10** Sections of major organ slices from mice.
